# Supplementary material
Source: MDPI journal article supplement (https://www.mdpi.com/2073-4441/13/9/1157)
Supplement: s1 [file s1]

# Supplementary material

## Characterization of the spatial variation of microbial communities in a decentralized subtropical wastewater treatment plant using passive methods

Marycarmen Verduzco Garibay <sup>1</sup>, Alberto Fernández del Castillo <sup>1</sup>, Osiris Díaz Torres<sup>2</sup>, José de Anda<sup>3</sup>, Carlos Yebra-Montes <sup>4</sup>, Carolina Senés-Guerrero <sup>1,\*</sup> and Misael Sebastián Gradilla-Hernández <sup>1,\*</sup>

<sup>1</sup> Tecnológico de Monterrey, Escuela de Ingeniería y Ciencias. Av. General Ramon Corona 2514, Nuevo México, CP 45138 Zapopan, Jalisco, México

<sup>2</sup> Unidad de Servicios Analíticos y Metrológicos, Centro de Investigación y Asistencia en Tecnología y Diseño del Estado de Jalisco, A.C., Av. Normalistas 800, Colinas de la Normal, 44270, Colinas de la Normal, Guadalajara, Jalisco, Mexico

<sup>3</sup> Unidad de Tecnología Ambiental, Centro de Investigación y Asistencia en Tecnología y Diseño del Estado de Jalisco, A. C. Av. Normalistas 800 Colinas de la Normal, 44270, Colinas de la Normal, Guadalajara, Jalisco, Mexico

<sup>4</sup> ENES- León, Universidad Nacional Autónoma de México, Blvd. UNAM 2011, Predio el Saucillo y El Potrero León, 37684 Guanajuato, CP, Mexico

\*Correspondence: carolina.senes@tec.mx; msgradilla@tec.mx

Received: date; Accepted: date; Published: date

**Table S1.** Removal efficiencies of the overall system and for stage

| Parameter        | Removal efficiency (%) |         |         |         | Mass reduction (mg/L) |               |              |               |
|------------------|------------------------|---------|---------|---------|-----------------------|---------------|--------------|---------------|
|                  | ST                     | UAF     | HFCW    | OS      | ST                    | UAF           | HFCW         | OS            |
| BOD <sub>5</sub> | 33 ± 07                | 57 ± 17 | 64 ± 08 | 90 ± 05 | 201.6 ± 60.2          | 243.2 ± 105.1 | 103.3 ± 22.1 | 548.1 ± 117.0 |
| COD              | 35 ± 05                | 55 ± 16 | 67 ± 10 | 90 ± 05 | 330.8 ± 92.8          | 345.2 ± 136.9 | 171.0 ± 37.0 | 847.1 ± 181.0 |
| TSS              | 73 ± 04                | 41 ± 15 | 78 ± 05 | 97 ± 00 | 257.7 ± 65.2          | 38.8 ± 15.0   | 42.5 ± 11.4  | 339.0 ± 73.3  |
| TNK              | 12 ± 11                | 12 ± 03 | 36 ± 07 | 51 ± 05 | 42.3 ± 37.7           | 36.2 ± 8.4    | 94.6 ± 25.9  | 173.0 ± 20.3  |
| NH <sub>4</sub>  | 07 ± 10                | 08 ± 04 | 35 ± 08 | 45 ± 04 | 11.4 ± 15.7           | 10.9 ± 6.9    | 46.3 ± 13.5  | 68.5 ± 7.2    |
| ON               | 17 ± 13                | 17 ± 03 | 37 ± 07 | 57 ± 08 | 32.7 ± 25.6           | 25.3 ± 2.4    | 48.3 ± 12.8  | 106.2 ± 17.0  |
| NO <sub>2</sub>  | 53 ± 32                | 44 ± 15 | 63 ± 08 | 91 ± 05 | 1.90 ± 1.82           | 0.45 ± 0.22   | 0.33 ± 0.08  | 2.7 ± 1.7     |
| NO <sub>3</sub>  | 44 ± 15                | 67 ± 14 | 74 ± 13 | 95 ± 02 | 0.12 ± 0.05           | 0.10 ± 0.04   | 0.03 ± 0.02  | 0.2 ± 0.1     |

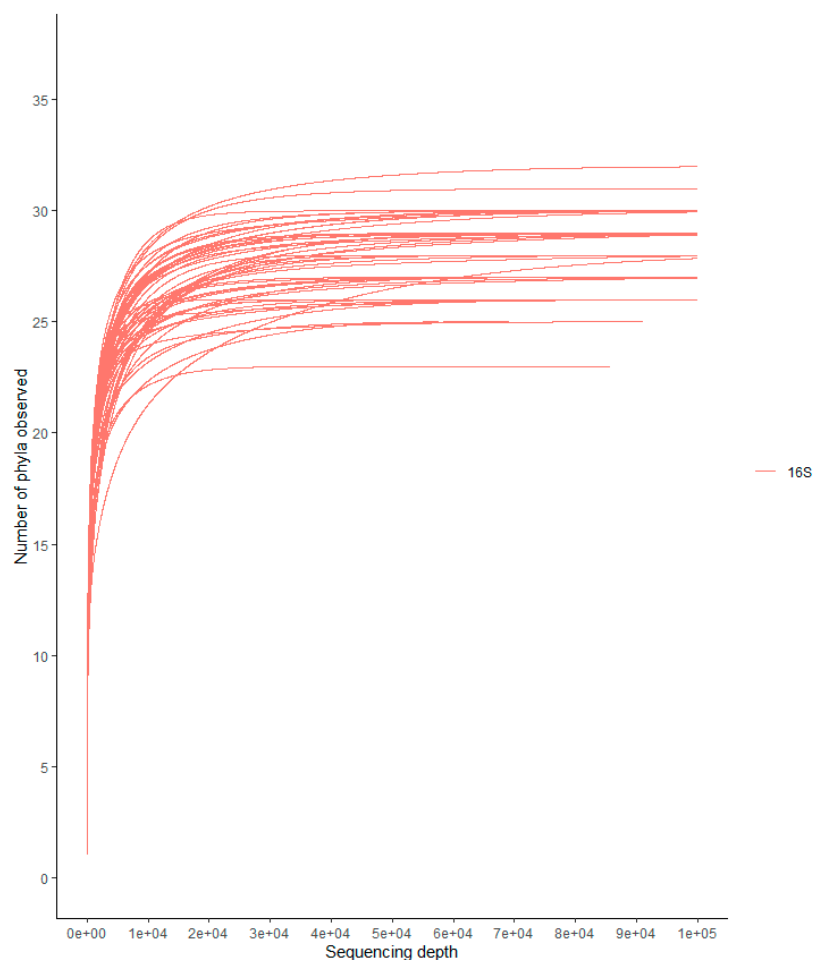

**Figure S1.** Rarefaction curve of 16S rRNA gene samples.

**Table S2.** Percentage of reads classified as bacterial phyla > 1% using Greengenes 13\_8. Comparison between the three treatment stages (ST, UAF and HFCW) for nitrogen degrading families.

| Phyla > 1%       | Greengenes % |        |        |
|------------------|--------------|--------|--------|
|                  | ST           | UAF    | HFCW   |
| Proteobacteria   | 33.92%       | 37.81% | 59.85% |
| Acidobacteria    | 2.05%        | 1.78%  | 3.96%  |
| Actinobacteria   | 5.68%        | 5.41%  | 7.61%  |
| Bacteroidetes    | 13.66%       | 8.81%  | 9.04%  |
| Caldiserica      | 5.69%        | 13.97% | -      |
| Chloroflexi      | 1.62%        | 1.12%  | 4.45%  |
| Cyanobacteria    | -            | -      | 3.06%  |
| Firmicutes       | 25.49%       | 20.81% | 4.23%  |
| Synergistetes    | 2.51%        | 4.05%  | -      |
| Gemmatimonadetes | -            | -      | 1.15%  |
| Nitrospirae      | -            | -      | 1.98%  |
| Un Bacteria      | 6.59%        | 3.93%  | 1.01%  |
| Others           | 2.78%        | 2.32%  | 3.66%  |

**Table S3.** Percentage of reads classified as bacteria phyla > 1% using Greengenes 13\_8. Vertical variations within the UAF.

| Phyla > 1%     | Greengenes % |        |
|----------------|--------------|--------|
|                | Surface      | Bottom |
| Proteobacteria | 40.79%       | 33.27% |

|                |        |        |
|----------------|--------|--------|
| Acidobacteria  | 1.35%  | 2.43%  |
| Actinobacteria | 4.57%  | 6.68%  |
| Bacteroidetes  | 10.02% | 6.96%  |
| Caldiserica    | 15.31% | 11.93% |
| Chloroflexi    | 1.31%  | -      |
| Firmicutes     | 19.73% | 22.44% |
| Synergistetes  | 3.16%  | 5.41%  |
| Un Bacteria    | 2.21%  | 6.53%  |
| Others         | 1.54%  | 4.34%  |

**Table S4.** Percentage of reads classified as bacteria phyla > 1% using Greengenes 13\_8. Vertical variations within the HFCW.

| Phyla > 1%       | GreenGenes % |        |
|------------------|--------------|--------|
|                  | 10 cm        | 50 cm  |
| Proteobacteria   | 58.65%       | 61.03% |
| Acidobacteria    | 4.75%        | 3.18%  |
| Actinobacteria   | 10.02%       | 5.20%  |
| Bacteroidetes    | 6.00%        | 12.07% |
| Chloroflexi      | 2.81%        | 6.08%  |
| Cyanobacteria    | 5.83%        | -      |
| Firmicutes       | 3.37%        | 5.08%  |
| Gemmatimonadetes | 1.70%        | -      |
| Nitrospirae      | 2.97%        | -      |
| Spirochaetes     | -            | 1.21%  |
| Un Bacteria      | -            | 1.20%  |
| Others           | 3.89%        | 4.94%  |

**Table S5.** Percentage of reads classified as bacteria phyla > 1% using Greengenes 13\_8. Longitudinal variations within the HFCW (Inlet, Middle and Outlet).

| Phyla > 1%       | GreenGenes % |        |        |
|------------------|--------------|--------|--------|
|                  | Inlet        | Middle | Outlet |
| Proteobacteria   | 60.08%       | 60.28% | 59.15% |
| Acidobacteria    | 3.48%        | 4.30%  | 4.15%  |
| Actinobacteria   | 5.85%        | 8.07%  | 9.05%  |
| Bacteroidetes    | 11.02%       | 9.08%  | 6.85%  |
| Chloroflexi      | 4.26%        | 5.98%  | 3.12%  |
| Cyanobacteria    | 4.47%        | 1.27%  | 3.35%  |
| Firmicutes       | 3.45%        | 3.38%  | 5.94%  |
| Gemmatimonadetes | -            | 1.55%  | 1.22%  |
| Nitrospirae      | 2.56%        | 1.65%  | 1.67%  |
| Spirochaetes     | -            | -      | 1.00%  |
| Un Bacteria      | -            | -      | 1.14%  |
| Others           | 4.84%        | 4.43%  | 3.37%  |

**Table S6.** Percentage of reads classified as bacteria family > 1% using Greengenes 13\_8. Comparison between the three treatment stages (ST, UAF and HFCW) regarding the nitrogen degrading families.

| Family > 1%              | GreenGenes % |       |       |
|--------------------------|--------------|-------|-------|
|                          | ST           | UAF   | HFCW  |
| <i>Microbacteriaceae</i> | 2.40%        | 3.58% | 1.35% |
| <i>Mycobacteriaceae</i>  | 2.20%        | 4.11% | 2.35% |

|                                  |        |        |        |
|----------------------------------|--------|--------|--------|
| <i>Propionibacteriaceae</i>      | 9.15%  | 3.41%  | -      |
| <i>Bacillaceae</i>               | 2.04%  | 1.96%  | -      |
| <i>Nitrospiraceae</i>            | 1.19%  | 2.12%  | 6.10%  |
| <i>Bradyrhizobiaceae</i>         | -      | 2.07%  | 3.55%  |
| <i>Thermodesulfobibrionaceae</i> | 2.45%  | -      | 1.28%  |
| <i>Hyphomicrobiaceae</i>         | 3.59%  | 5.37%  | 10.15% |
| <i>Caulobacteraceae</i>          | -      | 1.18%  | 1.79%  |
| <i>Rhizobiaceae</i>              | 1.86%  | 3.76%  | 2.46%  |
| <i>Rhodospirillaceae</i>         | 2.10%  | 3.60%  | 6.55%  |
| <i>Comamonadaceae</i>            | 23.85% | 11.64% | 13.05% |
| <i>Rhodocyclaceae</i>            | 30.96% | 39.23% | 28.00% |
| <i>Pseudomonadaceae</i>          | 9.76%  | 4.03%  | 1.53%  |
| <i>Xanthomonadaceae</i>          | 5.09%  | 7.41%  | 15.49% |
| <i>Chromatiaceae</i>             | 1.07%  | 4.97%  | 4.51%  |
| Others                           | 2.27%  | 1.56%  | 1.85%  |

**Table S7.** Percentage of reads classified as bacteria family > 1% using Greengenes 13\_8. Vertical variations of nitrogen degrading families within the UAF.

| Family > 1%                 | GreenGenes % |        |
|-----------------------------|--------------|--------|
|                             | Surface      | Bottom |
| <i>Microbacteriaceae</i>    | 2.48%        | 5.50%  |
| <i>Mycobacteriaceae</i>     | 2.04%        | 7.69%  |
| <i>Propionibacteriaceae</i> | 3.26%        | 3.68%  |
| <i>Bacillaceae</i>          | 2.51%        | -      |
| <i>Nitrospiraceae</i>       | 1.03%        | 4.00%  |
| <i>Bradyrhizobiaceae</i>    | 1.41%        | 3.20%  |
| <i>Hyphomicrobiaceae</i>    | 4.18%        | 7.42%  |
| <i>Caulobacteraceae</i>     | -            | 1.84%  |
| <i>Rhizobiaceae</i>         | 3.26%        | 4.63%  |
| <i>Rhodospirillaceae</i>    | 2.10%        | 6.20%  |
| <i>Comamonadaceae</i>       | 9.53%        | 15.30% |
| <i>Rhodocyclaceae</i>       | 51.72%       | 17.62% |
| <i>Pseudomonadaceae</i>     | 4.91%        | 2.52%  |
| <i>Xanthomonadaceae</i>     | 3.65%        | 13.93% |
| <i>Chromatiaceae</i>        | 5.55%        | 3.96%  |
| Others                      | 2.37%        | 2.52%  |

**Table S8.** Percentage of reads classified as bacteria family > 1% using Greengenes 13\_8. Vertical variations of nitrogen degrading families within the HFCW.

| Family > 1%                      | GreenGenes % |       |
|----------------------------------|--------------|-------|
|                                  | 10 cm        | 50 cm |
| <i>Microbacteriaceae</i>         | 1.58%        | 1.04% |
| <i>Mycobacteriaceae</i>          | 3.20%        | 1.25% |
| <i>Nitrospiraceae</i>            | 9.47%        | 1.71% |
| <i>Thermodesulfobibrionaceae</i> | -            | 2.27% |
| <i>Bradyrhizobiaceae</i>         | 4.46%        | 2.35% |
| <i>Hyphomicrobiaceae</i>         | 10.67%       | 9.49% |
| <i>Caulobacteraceae</i>          | 2.51%        | -     |

|                          |        |        |
|--------------------------|--------|--------|
| <i>Rhizobiaceae</i>      | 3.07%  | 1.67%  |
| <i>Rhodospirillaceae</i> | 9.30%  | 2.96%  |
| <i>Comamonadaceae</i>    | 14.41% | 11.27% |
| <i>Rhodocyclaceae</i>    | 11.71% | 49.20% |
| <i>Pseudomonadaceae</i>  | 2.02%  | -      |
| <i>Xanthomonadaceae</i>  | 23.08% | 5.61%  |
| <i>Chromatiaceae</i>     | 1.74%  | 8.11%  |
| Others                   | 2.77%  | 3.08%  |

**Table S9.** Percentage of reads classified as bacteria family removal > 1% using Greengenes 13\_8. Longitudinal variations of nitrogen degrading families within the HFCW (Inlet, Middle and Outlet).

| Family > 1%                   | GreenGenes % |        |        |
|-------------------------------|--------------|--------|--------|
|                               | Inlet        | Middle | Outlet |
| <i>Microbacteriaceae</i>      | 1.12%        | 1.80%  | 1.15%  |
| <i>Mycobacteriaceae</i>       | 1.60%        | 2.01%  | 3.69%  |
| <i>Nitrospiraceae</i>         | 8.31%        | 5.00%  | 4.40%  |
| <i>Thermodesulfobionaceae</i> | -            | 1.23%  | 2.12%  |
| <i>Bradyrhizobiaceae</i>      | 2.19%        | 5.05%  | 3.70%  |
| <i>Hyphomicrobiaceae</i>      | 6.82%        | 13.07% | 11.36% |
| <i>Caulobacteraceae</i>       | 1.55%        | 2.23%  | 1.62%  |
| <i>Rhizobiaceae</i>           | 1.23%        | 3.17%  | 3.30%  |
| <i>Rhodospirillaceae</i>      | 3.51%        | 7.47%  | 9.52%  |
| <i>Comamonadaceae</i>         | 12.52%       | 12.24% | 14.60% |
| <i>Rhodocyclaceae</i>         | 23.21%       | 29.07% | 33.09% |
| <i>Pseudomonadaceae</i>       | -            | 2.66%  | 1.28%  |
| <i>Xanthomonadaceae</i>       | 26.10%       | 10.61% | 6.89%  |
| <i>Chromatiaceae</i>          | 9.12%        | 2.27%  | -      |
| Others                        | 2.71%        | 2.12%  | 3.27%  |

**Table S10.** Percentage of reads classified as bacteria family > 1% using Greengenes 13\_8. Comparison between the three treatment stages (ST, UAF and HFCW) for organic matter degrading families.

| Family > 1%                 | GreenGenes % |        |       |
|-----------------------------|--------------|--------|-------|
|                             | ST           | UAF    | HFCW  |
| <i>Bacteroidaceae</i>       | 6.07%        | 2.82%  | 1.96% |
| <i>Cytophagaceae</i>        | -            | -      | 3.05% |
| <i>Chitinophagaceae</i>     | -            | -      | 5.53% |
| <i>Porphyromonadaceae</i>   | 9.79%        | 6.07%  | 1.82% |
| <i>Saprospiraceae</i>       | -            | -      | 1.11% |
| <i>Acidaminobacteraceae</i> | -            | 1.70%  | -     |
| <i>Clostridiaceae</i>       | 16.36%       | 17.97% | 5.20% |
| <i>Lachnospiraceae</i>      | 9.12%        | 2.60%  | 1.33% |
| <i>Lactobacillaceae</i>     | 4.15%        | -      | -     |
| <i>Mogibacteriaceae</i>     | 1.36%        | 2.47%  | -     |
| <i>Ruminococcaceae</i>      | 16.45%       | 4.95%  | 1.13% |
| <i>Acetobacteraceae</i>     | -            | 1.06%  | 6.66% |
| <i>Methylocystaceae</i>     | 1.37%        | 3.36%  | 6.98% |
| <i>Rhodobacteraceae</i>     | 1.02%        | 1.21%  | 2.56% |
| <i>Shingomonadaceae</i>     | -            | -      | 3.18% |

|                             |       |        |        |
|-----------------------------|-------|--------|--------|
| <i>Hydrogenophilaceae</i>   | -     | 1.19%  | 4.62%  |
| <i>Enterobacteriaceae</i>   | 5.74% | 1.62%  | -      |
| <i>Methylophilaceae</i>     | -     | -      | 2.60%  |
| <i>Methylococcaceae</i>     | -     | 1.19%  | 5.06%  |
| <i>Moraxellaceae</i>        | 3.59% | 1.20%  | -      |
| <i>Sinobacteraceae</i>      | 1.12% | 1.91%  | 15.82% |
| <i>Desulfobacteraceae</i>   | 1.02% | 2.68%  | 2.79%  |
| <i>Desulfobulbaceae</i>     | 2.55% | 2.00%  | 1.41%  |
| <i>Desulfomicrobiaceae</i>  | 1.01% | -      | -      |
| <i>Desulfovibrionaceae</i>  | 6.81% | 3.46%  | -      |
| <i>Geobacteraceae</i>       | 2.01% | 4.42%  | 2.48%  |
| <i>Syntrophaceae</i>        | 6.55% | 28.82% | 17.45% |
| <i>Syntrophobacteraceae</i> | -     | 3.88%  | 2.45%  |
| Others                      | 3.91% | 3.44%  | 4.82%  |

**Table S11.** Percentage of reads classified as bacteria family > 1% using Greengenes 13\_8 involved in organic degradation at vertical variations within the UAF.

| Family > 1%                 | GreenGenes % |        |
|-----------------------------|--------------|--------|
|                             | Surface      | Bottom |
| <i>Bacteroidaceae</i>       | 3.68%        | 1.27%  |
| <i>Porphyromonadaceae</i>   | 6.38%        | 5.51%  |
| <i>Acidaminobacteraceae</i> | 2.59%        | -      |
| <i>Clostridiaceae</i>       | 16.37%       | 20.85% |
| <i>Lachnospiraceae</i>      | 1.53%        | 4.52%  |
| <i>Mogibacteriaceae</i>     | 1.82%        | 3.63%  |
| <i>Ruminococcaceae</i>      | 3.89%        | 6.86%  |
| <i>Acetobacteraceae</i>     | -            | 1.18%  |
| <i>Methylocystaceae</i>     | 3.88%        | 2.42%  |
| <i>Hydrogenophilaceae</i>   | 1.53%        | -      |
| <i>Enterobacteriaceae</i>   | 1.97%        | -      |
| <i>Methylococcaceae</i>     | 1.36%        | -      |
| <i>Moraxellaceae</i>        | 1.54%        | -      |
| <i>Rhodobacteraceae</i>     | -            | 2.50%  |
| <i>Sinobacteraceae</i>      | 1.34%        | 2.92%  |
| <i>Desulfobacteraceae</i>   | 3.71%        | -      |
| <i>Desulfobulbaceae</i>     | 1.80%        | 2.35%  |
| <i>Desulfovibrionaceae</i>  | 2.51%        | 5.16%  |
| <i>Geobacteraceae</i>       | 5.12%        | 3.16%  |
| <i>Syntrophaceae</i>        | 28.83%       | 28.81% |
| <i>Syntrophobacteraceae</i> | 5.62%        | -      |
| Others                      | 4.52%        | 8.84%  |

**Table S12.** Percentage of reads classified as bacteria > 1% using Greengenes 13\_8 involved in organic degradation of vertical variations within the HFCW depth.

| Family > 1%           | GreenGenes % |       |
|-----------------------|--------------|-------|
|                       | 10 cm        | 50 cm |
| <i>Bacteroidaceae</i> | 1.00%        | 2.73% |
| <i>Cytophagaceae</i>  | 6.14%        | -     |

|                             |        |        |
|-----------------------------|--------|--------|
| <i>Prophyromonadaceae</i>   | -      | 2.67%  |
| <i>Chitinophagaceae</i>     | 10.44% | -      |
| <i>Saprospiraceae</i>       | 1.25%  | 1.00%  |
| <i>Clostridiaceae</i>       | 5.50%  | 4.95%  |
| <i>Lachnospiraceae</i>      | -      | 1.65%  |
| <i>Ruminococcaceae</i>      | -      | 1.38%  |
| <i>Acetobacteraceae</i>     | 9.42%  | 4.40%  |
| <i>Methylocystaceae</i>     | 9.03%  | 5.30%  |
| <i>Rhodobacteraceae</i>     | 3.27%  | 1.97%  |
| <i>Sphingomonadaceae</i>    | 5.33%  | 1.41%  |
| <i>Xanthobacteraceae</i>    | 1.42%  | -      |
| <i>Hydrogenophilaceae</i>   | 2.52%  | 6.33%  |
| <i>Methylophilaceae</i>     | 2.10%  | 3.00%  |
| <i>Enterobacteriaceae</i>   | 1.21%  | -      |
| <i>Methylococcaceae</i>     | 6.84%  | 3.61%  |
| <i>Sinobacteraceae</i>      | 15.98% | 15.69% |
| <i>Desulfobacteraceae</i>   | 1.11%  | 4.17%  |
| <i>Desulfobulbaceae</i>     | -      | 2.07%  |
| <i>Geobacteraceae</i>       | 2.75%  | 2.26%  |
| <i>Syntrophaceae</i>        | 6.96%  | 26.04% |
| <i>Syntrophobacteraceae</i> | 2.52%  | 2.40%  |
| Others                      | 5.20%  | 5.43%  |

**Table S13.** Percentage of reads classified as bacteria family > 1% using Greengenes 13\_8. Longitudinal variations of organic matter degrading families within the HFCW (Inlet, Middle and Outlet).

| Family > 1%                 | GreenGenes % |        |        |
|-----------------------------|--------------|--------|--------|
|                             | Inlet        | Middle | Outlet |
| <i>Bacteroidaceae</i>       | 4.16%        | -      | -      |
| <i>Cytophagaceae</i>        | 1.47%        | 3.26%  | 4.69%  |
| <i>Chitinophagaceae</i>     | 6.38%        | 5.44%  | 4.62%  |
| <i>Prophyromonadaceae</i>   | 3.08%        | -      | 1.23%  |
| <i>Saprospiraceae</i>       | -            | 1.87%  | 1.03%  |
| <i>Acidaminobacteraceae</i> | -            | -      | 1.12%  |
| <i>Clostridiaceae</i>       | 4.08%        | 4.26%  | 7.47%  |
| <i>Lachnospiraceae</i>      | -            | 1.28%  | 2.10%  |
| <i>Mogibacteriaceae</i>     | -            | -      | 1.27%  |
| <i>Ruminococcaceae</i>      | 4.08%        | -      | 1.52%  |
| <i>Acetobacteraceae</i>     | 1.12%        | 8.17%  | 4.55%  |
| <i>Methylocystaceae</i>     | 7.15%        | 7.49%  | 6.81%  |
| <i>Rhodobacteraceae</i>     | 6.69%        | 2.37%  | 3.71%  |
| <i>Sphingomonadaceae</i>    | 1.73%        | 3.11%  | 4.93%  |
| <i>Xanthobacteraceae</i>    | -            | -      | 1.48%  |
| <i>Hydrogenophilaceae</i>   | 7.08%        | 4.13%  | 2.20%  |
| <i>Methylophilaceae</i>     | -            | 3.22%  | 3.92%  |
| <i>Enterobacteriaceae</i>   | -            | 1.05%  | 1.25%  |
| <i>Methylococcaceae</i>     | 8.21%        | 3.84%  | 2.60%  |
| <i>Sinobacteraceae</i>      | 13.70%       | 17.43% | 16.69% |
| <i>Desulfobacteraceae</i>   | 2.51%        | 2.53%  | 3.39%  |

|                             |        |        |        |
|-----------------------------|--------|--------|--------|
| <i>Desulfobulbaceae</i>     | -      | 1.41%  | 2.37%  |
| <i>Desulfovibrionaceae</i>  | -      | -      | 1.32%  |
| <i>Geobacteraceae</i>       | 2.66%  | 3.30%  | 1.44%  |
| <i>Syntrophaceae</i>        | 21.07% | 16.88% | 13.77% |
| <i>Syntrophobacteraceae</i> | 1.77%  | 3.35%  | 2.36%  |
| Others                      | 5.41%  | 5.58%  | 2.18%  |

**Table S14.** PerMANOVA and ANOSIM analyses for the vertical (UAF and HFCW) and longitudinal variations (HFCW) for nitrogen and organic matter degrading families.

| Bacteria                               | ANOSIM R                             | Significance                         |
|----------------------------------------|--------------------------------------|--------------------------------------|
| <b>Nitrogen related bacteria</b>       | Unit: 0.5486                         | Unit: 0.001*                         |
|                                        | UAF Depth: 0.4889                    | UAF Depth: 0.007*                    |
|                                        | HFCW Longitudinal variations: 0.2549 | HFCW Longitudinal variations: 0.001* |
|                                        | HFCW Depth: 0.4933                   | HFCW Depth: 0.001*                   |
| <b>Organic matter related bacteria</b> | Unit: 0.6311                         | Unit: 0.001*                         |
|                                        | UAF Depth: 0.3056                    | UAF Depth: 0.003*                    |
|                                        | HFCW Longitudinal variations: 0.1996 | HFCW Longitudinal variations: 0.008* |
|                                        | HFCW Depth: 0.4575                   | HFCW Depth: 0.001*                   |

### Nitrogen degrading families

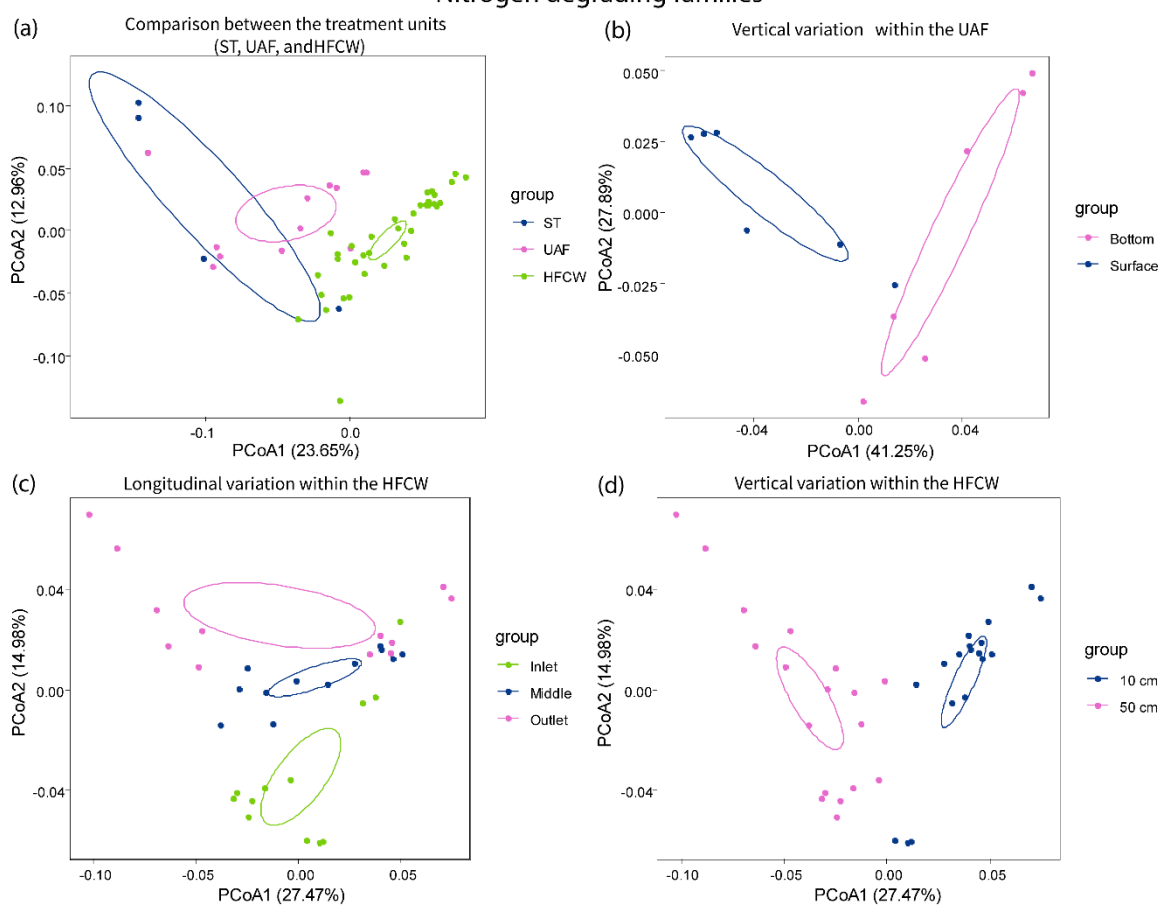



**Figure S2.** PCoA for nitrogen removal related bacterial families. **(a)** Comparison between the treatment units (ST, UAF, and HFCW), **(b)** Vertical variations within the UAF. **(c)** Longitudinal variations within the HFCW **(d)** Vertical variation within the HFCW.

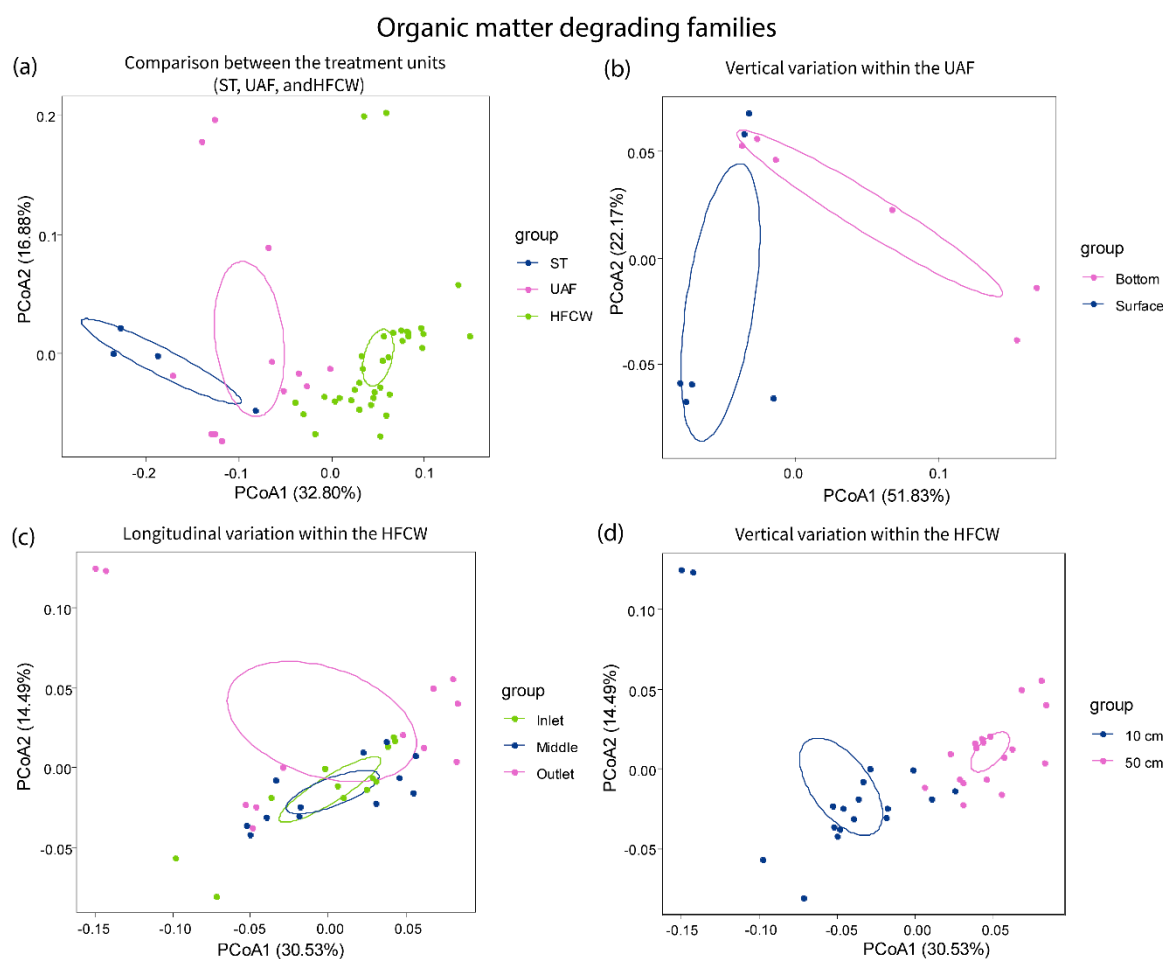

**Figure S3.** PCoA for organic matter removal degrading families. **(a)** Comparison between the treatment units (ST, UAF, and HFCW), **(b)** Vertical variations within the UAF. **(c)** Longitudinal variations within the HFCW **(d)** Vertical variation within the HFCW.

**Table S15.** RDA for nitrogen degrading families (first four significant redundancy components).

| Variable           | RDA1    | RDA2    | RDA3    | RDA4    |
|--------------------|---------|---------|---------|---------|
| pH                 | -0.3575 | -0.4277 | 0.5001  | -0.6627 |
| Temperature        | -0.7966 | 0.2480  | -0.4519 | 0.3156  |
| DO                 | -0.2291 | 0.4402  | 0.3653  | -0.7876 |
| EC                 | -0.6288 | 0.0047  | 0.5972  | 0.4980  |
| BOD <sub>5</sub>   | -0.6750 | 0.1776  | -0.1297 | -0.0452 |
| COD                | -0.6842 | 0.2126  | -0.0877 | -0.0178 |
| TSS                | -0.7106 | 0.0591  | 0.2101  | -0.1142 |
| TNK                | -0.6066 | 0.4802  | 0.0281  | 0.1454  |
| NH <sub>3</sub> -N | -0.5763 | 0.5560  | 0.0238  | 0.2618  |
| ON                 | -0.6118 | 0.4157  | 0.0303  | 0.0616  |
| NO <sub>2</sub>    | -0.7105 | 0.0453  | 0.2438  | -0.1911 |

**Table S16.** RDA for organic matter degrading families (first four significant redundancy components).

| Variable | RDA1     | RDA2    | RDA3    | RDA4    |
|----------|----------|---------|---------|---------|
| pH       | -0.09092 | -0.5845 | -0.5187 | -0.6173 |

|                        |          |         |         |         |
|------------------------|----------|---------|---------|---------|
| <b>Temperature</b>     | -0.92198 | 0.1128  | 0.3310  | 0.1663  |
| <b>DO</b>              | -0.21471 | 0.2501  | -0.7993 | -0.5025 |
| <b>EC</b>              | -0.51209 | -0.5360 | -0.3538 | 0.5703  |
| <b>BOD<sub>5</sub></b> | 0.8045   | -0.0810 | 0.0813  | -0.0156 |
| <b>COD</b>             | 0.7913   | -0.0327 | 0.0795  | -0.0063 |
| <b>TSS</b>             | 0.7276   | 0.1657  | -0.0306 | 0.0782  |
| <b>TNK</b>             | 0.6965   | 0.3853  | 0.3248  | -0.1739 |
| <b>NH3-N</b>           | 0.6432   | 0.4078  | 0.3468  | -0.1765 |
| <b>ON</b>              | 0.7152   | 0.3599  | 0.3012  | -0.1676 |
| <b>NO<sub>2</sub></b>  | 0.6855   | 0.1480  | -0.0546 | 0.2050  |

---
